# Supplementary material for: Pre-onset auroral signatures and subsequent development of substorm auroras: a development of ionospheric loop currents at the onset latitudes
Source: Copernicus journal article supplement (doi:10.5194/angeo-32-1011-2014), 2014-08-22
Supplement: Supplementary file 1 [file supplement-cover-letter.pdf › supplement-cover-letter.pdf]

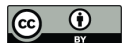

## *Supplement of*

# **Pre-onset auroral signatures and subsequent development of substorm auroras: a development of ionospheric loop currents at the onset latitudes**

**O. Saka et al.**

*Correspondence to:* O. Saka (saka.o@nifty.com)

- Supplement-Cover-Letter.pdf
- Animation\_1.mov
- Animation\_2.mov
